# Supplementary material for: Helical fluxionality: numerical frustration drives concerted low-barrier screw motions of a tricopper cluster
Source: Royal Society of Chemistry journal article supplement (doi:10.1039/d3sc00851g), 2023-01-01
Supplement: d3sc00851g1.pdf [file d3sc00851g1.pdf]

## Electronic Supplementary Information (ESI)

### Helical fluxionality: numerical frustration drives concerted low-barrier screw motions of a tricopper cluster

Heechan Kim, Juhwan Shin, Seyong Kim, and Dongwhan Lee\*

*Department of Chemistry, Seoul National University, 1 Gwanak-ro, Gwanak-gu, Seoul 08826, Korea*  
\*e-mail: dongwhan@snu.ac.kr

**General Considerations.** All reagents were purchased from commercial suppliers and used as received unless otherwise noted. The compounds 4-(*tert*-butyl)pyridine-2,6-dicarbaldehyde<sup>1</sup> and 4-methyl-7-(4,4,5,5-tetramethyl-1,3,2-dioxaborolan-2-yl)benzo[*c*][1,2,5]thiadiazole<sup>2</sup> were prepared according to literature procedures or their slight modifications. All air-sensitive manipulations were carried out under argon atmosphere in a glovebox or by standard Schlenk-line techniques.

**Physical Measurements.** <sup>1</sup>H NMR and <sup>13</sup>C NMR spectra were recorded on a 500 MHz Varian/Oxford As-500 spectrometer. Variable-temperature (VT) <sup>1</sup>H NMR spectra were recorded on a Varian Unity Inova 500 spectrometer or a Bruker Avance III 500 spectrometer. 2D <sup>1</sup>H–<sup>1</sup>H Exchange Spectroscopy (EXSY) and Rotating-frame Nuclear Overhauser Effect Correlation Spectroscopy (ROESY) NMR spectra were recorded on a Varian Unity Inova 500 (UI500) spectrometer. DOSY NMR spectra were recorded on a 850 MHz Bruker Avance III HD spectrometer. Chemical shifts were referenced to internal standard of tetramethylsilane (as  $\delta = 0.00$  ppm). High-resolution electrospray ionization (ESI) mass spectra were obtained on a Thermo Scientific LTQ Orbitrap XL mass spectrometer. Coldspray ionization (CSI) mass spectra were collected on a JEOL JMS-T100CS mass spectrometer equipped with a CSI source, using the following conditions: needle voltage = 2.2 kV; orifice 1 current = 50–500 nA; orifice 1 voltage = 0–20 V; ring lens voltage = 10 V; ion source temperature = 278 K; spray temperature = 233 K. FT-IR spectra were recorded on a Shimadzu IRTracer-100 FT-IR Spectrophotometer. Elemental analysis was performed by a PerkinElmer 2400 Series II CHNS/O Analyzer. Electronic absorption spectra for Job plot analysis were recorded on an Agilent 8453 UV–vis spectrophotometer with ChemStation software.

**2-Bromo-5-isopropoxyppyridine (2).** A 100 mL round-bottom flask was charged with 2-bromopropane (4.45 g, 36.2 mmol) and DMF (30 mL). To the solution was added 6-bromopyridin-3-ol (3.00 g, 17.2 mmol) and K<sub>2</sub>CO<sub>3</sub> (4.28 g, 31.0 mmol). The reaction mixture was heated at reflux for 18 h. After cooling to r.t., the mixture was diluted with EtOAc (100 mL), and washed with brine (50 mL × 3). The organic layer was dried over anhyd MgSO<sub>4</sub>, filtered, and concentrated under reduced pressure. With CH<sub>2</sub>Cl<sub>2</sub> as an eluent, flash column chromatography on SiO<sub>2</sub> furnished **2** as a brown oil (3.32 g, 15.4 mmol, yield = 89%). <sup>1</sup>H NMR (500 MHz, CDCl<sub>3</sub>, 298 K)  $\delta$  8.03 (d, *J* =

<sup>1</sup> L. M. Thierer, Q. Wang, S. H. Brooks, P. Cui, J. Qi, M. R. Gau, B. C. Manor, P. J. Carroll and N. C. Tomson, *Polyhedron*, 2021, **198**, 115044.

<sup>2</sup> T. Yamamoto, R. Murakami and M. Suginome, *J. Am. Chem. Soc.*, 2017, **139**, 2557–2560.

2.7 Hz, 1H), 7.35 (d,  $J = 8.7$  Hz, 1H), 7.07 (dd,  $J = 8.7, 3.0$  Hz, 1H), 4.54 (m,  $J = 6.0$  Hz, 1H), 1.35 (d,  $J = 6.0$  Hz, 6H).  $^{13}\text{C}$  NMR (125 MHz,  $\text{CDCl}_3$ , 298 K)  $\delta$  153.79, 138.80, 131.70, 128.14, 126.00, 71.12, 21.76. FT-IR (ATR,  $\text{cm}^{-1}$ ): 3058, 2978, 2933, 2500, 2064, 1900, 1573, 1560, 1462, 1449, 1376, 1334, 1267, 1224, 1178, 1131, 1109, 1088, 1010, 945, 907, 861, 825. HRMS (ESI) calcd. for  $\text{C}_8\text{H}_{10}\text{BrNO}$   $[\text{M} + \text{H}]^+$  239.9818, found 239.9821.

**4-(5-Isopropoxy-pyridin-2-yl)-7-methylbenzo[*c*][1,2,5]thiadiazole (3).** A 250 mL 3-neck round-bottom flask was charged with **2** (2.91 g, 13.9 mmol), 4-methyl-7-(4,4,5,5-tetramethyl-1,3,2-dioxaborolan-2-yl)benzo[*c*][1,2,5]thiadiazole (2.56 g, 9.27 mmol),  $\text{Pd}(\text{PPh}_3)_4$  (0.541 g, 0.463 mmol), and  $\text{K}_2\text{CO}_3$  (3.84 g, 27.8 mmol) under an Ar atmosphere. To the mixture was added degassed THF (50 mL) and  $\text{H}_2\text{O}$  (10 mL). The reaction was heated at reflux for 22 h. After cooling to r.t., volatile fractions were removed under reduced pressure, and the residual material was diluted with  $\text{CH}_2\text{Cl}_2$  (50 mL) and  $\text{H}_2\text{O}$  (50 mL). The aqueous phase was extracted into  $\text{CH}_2\text{Cl}_2$  (50 mL  $\times$  3). The combined organic layer was dried over anhyd  $\text{MgSO}_4$ , filtered, and concentrated under reduced pressure. Flash column chromatography on  $\text{SiO}_2$  (hexane:EtOAc = 100:0 to 85:15, v/v) furnished **3** as a yellow solid (2.39 g, 8.38 mmol, yield = 90%).  $^1\text{H}$  NMR (500 MHz,  $\text{CDCl}_3$ , 298 K)  $\delta$  8.57 (d,  $J = 8.8$  Hz, 1H), 8.43 (d,  $J = 2.8$  Hz, 1H), 8.26 (d,  $J = 7.2$  Hz, 1H), 7.49 (d,  $J = 7.2$  Hz, 1H), 7.34 (dd,  $J = 8.8, 2.9$  Hz, 1H), 4.67 (m,  $J = 6.0$  Hz, 1H), 2.78 (s, 3H), 1.41 (d,  $J = 6.1$  Hz, 6H).  $^{13}\text{C}$  NMR (125 MHz,  $\text{CDCl}_3$ , 298 K)  $\delta$  156.22, 153.49, 152.90, 146.60, 139.25, 131.37, 129.49, 128.60, 128.50, 124.89, 122.24, 70.69, 21.96, 18.09. FT-IR (ATR,  $\text{cm}^{-1}$ ): 3017, 2976, 2921, 1586, 1565, 1551, 1497, 1467, 1397, 1383, 1338, 1297, 1288, 1258, 1217, 1197, 1176, 1136, 1110, 1069, 1017, 946, 888, 847, 830. HRMS (ESI) calcd. for  $\text{C}_{28}\text{H}_{34}\text{N}_3\text{O}$   $[\text{M} + \text{H}]^+$  286.1009, found 286.1010.

**3-(5-Isopropoxy-pyridin-2-yl)-6-methylcyclohexa-3,5-diene-1,2-diamine (4).** A 250 mL round-bottom flask was charged with **3** (2.39 g, 8.38 mmol),  $\text{CoCl}_2 \cdot 6\text{H}_2\text{O}$  (400 mg, 1.68 mmol), and EtOH (100 mL). The solution was cooled to 0  $^\circ\text{C}$ , and  $\text{NaBH}_4$  (3.18 g, 83.8 mmol) was added slowly. The reaction mixture was heated at reflux under an Ar atmosphere for 4 h. After cooling to r.t., volatile fractions were removed under reduced pressure, and the residual material was diluted with  $\text{CH}_2\text{Cl}_2$  (50 mL). The mixture was cooled to 0  $^\circ\text{C}$ , and  $\text{H}_2\text{O}$  (50 mL) was added carefully to quench the remaining  $\text{NaBH}_4$ . The aqueous phase was extracted three times with  $\text{CH}_2\text{Cl}_2$  (50 mL  $\times$  3). The combined organic extracts were dried over anhyd  $\text{MgSO}_4$ , filtered, and concentrated under reduced pressure. Flash column chromatography on  $\text{SiO}_2$  (hexane:EtOAc = 10:0 to 3:7, v/v) furnished **4** as an orange solid (1.86 g, 7.22 mmol, yield = 86%).  $^1\text{H}$  NMR (500 MHz,  $\text{CDCl}_3$ , 298 K)  $\delta$  8.28 (d,  $J = 2.8$  Hz, 1H), 7.56 (d,  $J = 8.8$  Hz, 1H), 7.25 (dd,  $J = 8.8, 2.9$  Hz, 1H), 6.96 (d,  $J = 8.0$  Hz, 1H), 6.65 (d,  $J = 8.0$  Hz, 1H), 4.62–4.57 (m, 1H), 2.23 (s, 3H), 1.37 (d,  $J = 6.1$  Hz, 6H).  $^{13}\text{C}$  NMR (125 MHz,  $\text{CDCl}_3$ , 298 K)  $\delta$  152.12, 152.00, 136.65, 134.36, 133.73, 124.00, 123.06, 122.96, 122.12, 120.39, 119.39, 70.76, 21.97, 17.60. FT-IR (ATR,  $\text{cm}^{-1}$ ): 3365, 2975, 2929, 2854, 1611, 1553, 1500, 1473, 1460, 1434, 1383, 1334, 1267, 1243, 1220, 1176, 1136, 1109, 1018, 948, 907, 887, 838. HRMS (ESI) calcd. for  $\text{C}_{33}\text{H}_{37}\text{N}_4\text{O}$   $[\text{M} + \text{H}]^+$  258.1601, found 258.1604.

**2,2'-(4-(*tert*-Butyl)pyridine-2,6-diyl)bis(4-(5-isopropoxy-pyridin-2-yl)-7-methyl-1*H*-benzo[*d*]imidazole) (L).** A 100 mL 2-neck round-bottom flask was charged with **4** (599 mg, 2.33 mmol) and 4-(*tert*-butyl)pyridine-2,6-dicarbaldehyde (203 mg, 1.06 mmol). A portion of anhydrous EtOH (20 mL) was added, and the mixture was stirred at 50  $^\circ\text{C}$ . To the solution was added aqueous solution (4 mL) of  $\text{Na}_2\text{S}_2\text{O}_5$  (0.406 g, 2.12 mmol). The reaction mixture was heated at reflux under Ar atmosphere for 21 h. After cooling to r.t.,  $\text{H}_2\text{O}$  (10 mL) was added. The precipitate was isolated by filtration, washed with  $\text{H}_2\text{O}$  (50 mL), and dried in vacuo. Recrystallization from hot EtOH (100 mL) furnished **L** as a pink solid (0.458 g, 0.687 mmol, yield = 65%).  $^1\text{H}$  NMR (500 MHz,  $\text{CDCl}_3$ ,

298 K)  $\delta$  12.75 (s, 2H), 8.53 (s, 2H), 8.20 (d,  $J = 2.8$  Hz, 2H), 7.96 (d,  $J = 8.8$  Hz, 2H), 7.70 (d,  $J = 7.7$  Hz, 2H), 7.30 (dd,  $J = 8.8, 2.9$  Hz, 2H), 7.19 (d,  $J = 7.7$  Hz, 2H), 4.26 (m,  $J = 6.0$  Hz, 2H), 2.85 (s, 6H), 1.20 (d,  $J = 6.0$  Hz, 9H).  $^{13}\text{C}$  NMR (125 MHz,  $\text{CDCl}_3$ , 298 K)  $\delta$  162.74, 152.55, 150.82, 149.17, 148.52, 144.99, 136.82, 132.50, 130.91, 124.52, 122.84, 119.86, 119.67, 119.53, 70.52, 35.57, 30.70, 21.86, 16.97. FT-IR (ATR,  $\text{cm}^{-1}$ ): 3406, 2973, 1613, 1560, 1472, 1447, 1385, 1374, 1348, 1318, 1285, 1266, 1229, 1136, 1111, 951, 812. HRMS (ESI) calcd. for  $\text{C}_{33}\text{H}_{37}\text{N}_4\text{O}$   $[\text{M} + \text{H}]^+$  666.3551, found 666.3554.

**$[\text{Cu}_3\text{L}_2](\text{BF}_4)_3$  (**1**).** A mixture of **L** (227 mg, 0.341 mmol),  $\text{Cu}(\text{MeCN})_4(\text{BF}_4)$  (161 mg, 0.512 mmol), and  $\text{CH}_2\text{Cl}_2$  (20 mL) was stirred at r.t. under Ar for 20 h. To the mixture was added  $\text{Et}_2\text{O}$  (50 mL) to induce precipitation of greenish brown solid, which was isolated by filtration to afford **1** (284 mg, 0.159 mmol, yield = 93%). Anal. Calcd. for  $\text{Cu}_3\text{C}_{82}\text{H}_{86}\text{B}_3\text{F}_{12}\text{N}_{14}\text{O}_4$ : C, 55.25; H, 4.86; N, 11.00. Found: C, 55.22; H, 4.68; N, 10.73.

**X-ray Crystallographic Studies on 1.** Single crystals of **1** were prepared by slow diffusion of  $\text{Et}_2\text{O}$  into a MeCN solution of this material. A brown crystal (approximate dimensions  $0.389 \times 0.245 \times 0.197$  mm<sup>3</sup>) was placed onto a nylon loop with Paratone-N oil, and mounted on an XtaLAB AFC12 (RINC): Kappa dual home/near diffractometer. The data collection was carried out using Cu  $\text{K}\alpha$  radiation and the crystal was kept at  $T = 93$  K. A total of 27227 reflections were measured ( $6.274^\circ \leq 2\theta \leq 158.844^\circ$ ). The structure was solved with SHELXT<sup>3</sup> using direct methods, and refined with SHELXL<sup>4</sup> refinement package of OLEX2.<sup>5</sup> A total of 9070 unique reflections were used in all calculations. The final  $R1$  was 0.0565 ( $I \geq 2\sigma(I)$ ) and  $wR2$  was 0.1597 (all data). CCDC 2178526 contains the supplementary crystallographic data for this structure.

<sup>3</sup> G. M. Sheldrick, *Acta Cryst.*, 2015, **A71**, 3–8.

<sup>4</sup> G. M. Sheldrick, 2015, **C71**, 3–8.

<sup>5</sup> O. V. Dolomanov, L. J. Bourhis, R. J. Gildea, J. A. K. Howard and H. Puschmann, *J. Appl. Cryst.* 2009, **42**, 339–341.

### Determination of $\Delta G^\ddagger$ using VT 1D $^1\text{H}$ NMR spectroscopy.<sup>6,7</sup>

With an exchange between two equally populated sites, the NMR resonance ( $\nu$ ) can be expressed as coupled sets of Bloch equations, assuming that the Larmor frequencies of the two equally populated states are  $+\delta$  and  $-\delta$ .

$$\nu = \gamma B_1 M_z \frac{k(2\delta)^2}{(\delta - \omega)^2(\delta + \omega)^2 + 4k^2\omega^2} \quad (1)$$

Here,  $\gamma$  is the magnetogyric ratio;  $B_1$  is the field;  $M_z$  is  $z$  magnetization;  $k$  is the exchange rate;  $\omega$  is the frequency. At the coalescence temperature  $T_c$ , the top of the lineshape is flat. Therefore, both the first and second derivatives with respect to the frequency ( $\omega$ ) have to be zero. The rate constant  $k_c$  at  $T_c$  is thus given by eq (2).

$$k_c = \frac{\delta}{\sqrt{2}} \quad (2)$$

Since  $\delta$  is in radian per second,  $2\delta$  equals  $2\pi\Delta\nu$ , where  $\Delta\nu$  is the difference of chemical shift between the two resonances at the low temperature limit. From the Eyring equation (eq (3)), where  $k_B$  is the Boltzmann constant,  $h$  is the Planck constant, and  $R$  is the gas constant,

$$k_c = \frac{k_B T_c}{h} e^{-\frac{\Delta G^\ddagger}{RT_c}} \quad (3)$$

$\Delta G^\ddagger$  is expressed as eq (4).

$$\Delta G^\ddagger = (1.912 \times 10^{-2})(T_c) \left( 9.972 + \log\left(\frac{T_c}{\Delta\nu}\right) \right) \quad (4)$$

---

<sup>6</sup> F. P. Gasparro and N. H. Kolodny. *J. Chem. Educ.*, 1977, **54**, 258–261.

<sup>7</sup> H. Günther, in *NMR Spectroscopy*, Wiley-VCH, New York, 3rd edn, 2013, ch. 13.



### Determination of $\Delta G^\ddagger$ using VT 2D $^1\text{H}$ - $^1\text{H}$ EXSY NMR spectroscopy.<sup>8,9</sup>

For a thermoneutral equilibrium of  $A \rightleftharpoons B$ , the rate equations are given as eqs (5) and (6). Here,  $M_z^A(t)$  and  $M_z^B(t)$  are the deviations (from the Boltzmann distribution) of the magnetic moments in the  $z$ -direction of the hydrogen nuclear spins of A and B conformers, respectively, at time  $t$ ;  $k$  is the rate constant for the thermoneutral equilibrium of conformational exchange;  $\frac{1}{T_1}$  is the rate constant for  $T_1$  relaxation.

$$\frac{dM_z^A(t)}{dt} = -kM_z^A(t) + kM_z^B(t) - \frac{1}{T_1}M_z^A(t) \quad (5)$$

$$\frac{dM_z^B(t)}{dt} = -kM_z^B(t) + kM_z^A(t) - \frac{1}{T_1}M_z^B(t) \quad (6)$$

The matrix representation of eqs (5) and (6) is

$$\frac{d}{dt} \begin{pmatrix} M_z^A \\ M_z^B \end{pmatrix} = \begin{pmatrix} -k - \frac{1}{T_1} & k \\ k & -k - \frac{1}{T_1} \end{pmatrix} \begin{pmatrix} M_z^A \\ M_z^B \end{pmatrix} \quad (7)$$

After a diagonalization of the matrix, the solution of the differential equation at  $t = \tau_m$  is expressed as:

$$\begin{aligned} \begin{pmatrix} M_z^A(\tau_m) \\ M_z^B(\tau_m) \end{pmatrix} &= \begin{pmatrix} \cosh k\tau_m \exp\{-(k + T_1^{-1})\tau_m\} & \sinh k\tau_m \exp\{-(k + T_1^{-1})\tau_m\} \\ \sinh k\tau_m \exp\{-(k + T_1^{-1})\tau_m\} & \cosh k\tau_m \exp\{-(k + T_1^{-1})\tau_m\} \end{pmatrix} \begin{pmatrix} M_z^A(0) \\ M_z^B(0) \end{pmatrix} \\ &= \begin{pmatrix} a_{A \rightarrow A} & a_{B \rightarrow A} \\ a_{A \rightarrow B} & a_{B \rightarrow B} \end{pmatrix} \begin{pmatrix} M_z^A(0) \\ M_z^B(0) \end{pmatrix} \end{aligned} \quad (8)$$

Therefore, the intensities of the diagonal ( $a_{diag}$ ) and cross ( $a_{cross}$ ) peaks are

$$a_{diag}(\tau_m) = a_{A \rightarrow A} = a_{B \rightarrow B} = \cosh k\tau_m \exp\{-(k + T_1^{-1})\tau_m\} \quad (9)$$

$$a_{cross}(\tau_m) = a_{A \rightarrow B} = a_{B \rightarrow A} = \sinh k\tau_m \exp\{-(k + T_1^{-1})\tau_m\} \quad (10)$$

The ratio of  $a_{cross}$  and  $a_{diag}$  is eq (11), which is independent of  $T_1$ .

$$\frac{a_{cross}(\tau_m)}{a_{diag}(\tau_m)} = \frac{\sinh k\tau_m}{\cosh k\tau_m} = \tanh k\tau_m \quad (11)$$

Using the relationship of

$$\tanh^{-1} \frac{a_{cross}(\tau_m)}{a_{diag}(\tau_m)} = k\tau_m \quad (12)$$

the rate constant  $k$  for the exchange reaction is obtained from the slope of the  $(\tau_m, \tanh^{-1} \frac{a_{cross}(\tau_m)}{a_{diag}(\tau_m)})$  plot, as shown in **Fig. S16**.

The results are summarized in **Table S4** and **Table S5**.

Eyring analysis of these data provides the kinetic parameters  $\Delta G^\ddagger$ ,  $\Delta H^\ddagger$ , and  $\Delta S^\ddagger$  for the helical motion, as shown in **Fig. S17** and **Fig. S18**.

<sup>8</sup> J. Jeener, B. H. Meier, P. Bachmann and R. R. Ernst. *J. Chem. Phys.*, 1979, **71**, 4546–4553.

<sup>9</sup> P. W. Kuchel, B. T. Bulliman, B. E. Chapman and G. L. Mendz, *J. Magn. Reson.*, 1988, **76**, 136–142.

**Table S1.** Summary of X-ray crystallographic data for **1**.

| <b>1</b>                             |                                        |
|--------------------------------------|----------------------------------------|
| Chemical formula                     | $C_{43}H_{46}B_{1.5}Cu_{1.5}F_6N_8O_2$ |
| Formula weight                       | 932.40                                 |
| Crystal system                       | monoclinic                             |
| Space group                          | $C2/c$                                 |
| Color of crystal                     | Brown                                  |
| a (Å)                                | 29.3549(2)                             |
| b (Å)                                | 14.38170(10)                           |
| c (Å)                                | 21.2892(2)                             |
| $\alpha$ (°)                         | -                                      |
| $\beta$ (°)                          | 106.3040(10)                           |
| $\gamma$ (°)                         | -                                      |
| Volume (Å <sup>3</sup> )             | 8626.30(12)                            |
| Z                                    | 8                                      |
| R <sub>int</sub>                     | 0.0227                                 |
| Final R indices [ $I > 2\sigma(I)$ ] | $R_1 = 0.0565$ , $wR_2 = 0.1584$       |
| Final R indices [all data]           | $R_1 = 0.0581$ , $wR_2 = 0.1597$       |
| GOF                                  | 1.055                                  |

**Table S2.** Results of diffusion analysis on **1**.

| Solvent           | $T$ (K) | $\eta$ ( $10^{-4}$ Pa·s) | $D$ ( $\mu\text{m}^2 \text{s}^{-1}$ ) | DOSY hydrodynamic radius <sup>a</sup> (Å) |
|-------------------|---------|--------------------------|---------------------------------------|-------------------------------------------|
| THF- $d_8$        | 268     | 6.37 <sup>b</sup>        | 482                                   | 6.40                                      |
|                   | 278     | 5.63 <sup>b</sup>        | 590                                   | 6.13                                      |
|                   | 288     | 5.03 <sup>b</sup>        | 690                                   | 6.08                                      |
|                   | 298     | 4.52 <sup>b</sup>        | 728                                   | 6.62                                      |
| CDCl <sub>3</sub> | 298     | 5.76 <sup>c</sup>        | 845                                   | 4.77                                      |

<sup>a</sup> The hydrodynamic radius was estimated by the Stokes–Einstein equation:  $D = kBT/6\pi\eta r$

<sup>b</sup> The temperature-specific viscosity  $\eta$  (in P) of THF was estimated by using the equation<sup>10</sup>:  
 $\log \eta = -3.670 + 395/T$

<sup>c</sup> The viscosity of CHCl<sub>3</sub> at  $T = 298$  K<sup>11</sup>

<sup>10</sup> D. J. Metz and A. Glines, *J. Phys. Chem.*, 1967, **71**, 1158.

<sup>11</sup> R. A. Clará, A. C. G. Marigliano, D. Morales, and H. N. Sólamo, *J. Chem. Eng. Data*, 2010, **55**, 5862–5867.

**Table S3.** Parameters obtained from VT 1D NMR spectroscopy in various solvents.

|                                | $T_c$ (K) | $\Delta\nu$ (Hz) | $\Delta G^\ddagger$ (kcal mol <sup>-1</sup> ) |
|--------------------------------|-----------|------------------|-----------------------------------------------|
| THF- <i>d</i> <sub>8</sub>     | 273       | 130              | 12.9                                          |
| acetone- <i>d</i> <sub>6</sub> | 228       | 200              | 10.5                                          |

**Table S4.** Kinetic parameters for the helical motion of **1** determined by VT 2D <sup>1</sup>H-<sup>1</sup>H EXSY NMR spectroscopy in CDCl<sub>3</sub>.

| $T$ [K] | $k$ [s <sup>-1</sup> ] | $\ln k$ | $\ln (k/T)$ |
|---------|------------------------|---------|-------------|
| 313     | 33.89                  | 3.523   | -2.223      |
| 308     | 25.02                  | 3.220   | -2.510      |
| 303     | 18.57                  | 2.922   | -2.792      |
| 298     | 13.46                  | 2.600   | -3.097      |

**Table S5.** Kinetic parameters for the helical motion of **1** determined by VT 2D <sup>1</sup>H-<sup>1</sup>H EXSY NMR spectroscopy in CD<sub>2</sub>Cl<sub>2</sub>.

| $T$ [K] | $k$ [s <sup>-1</sup> ] | $\ln k$ | $\ln (k/T)$ |
|---------|------------------------|---------|-------------|
| 273     | 15.71                  | 2.754   | -2.855      |
| 268     | 6.465                  | 1.866   | -3.725      |
| 263     | 3.952                  | 1.374   | -4.198      |
| 253     | 1.017                  | 0.017   | -5.516      |

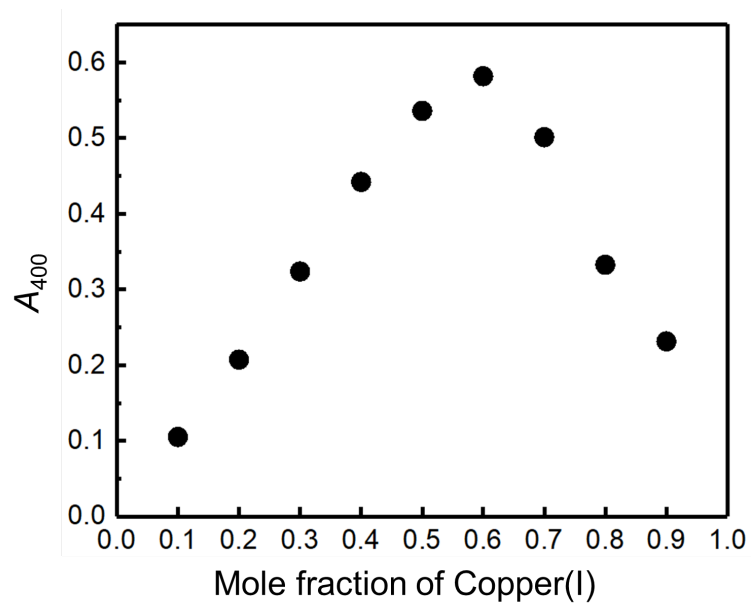

**Fig. S1.** Job plot analysis of the binding between  $[\text{Cu}(\text{MeCN})_4](\text{BF}_4)$  and **L** in THF ( $T = 298 \text{ K}$ ), plotted as absorbance at  $\lambda = 400 \text{ nm}$  vs mole fraction of copper(I) ion.

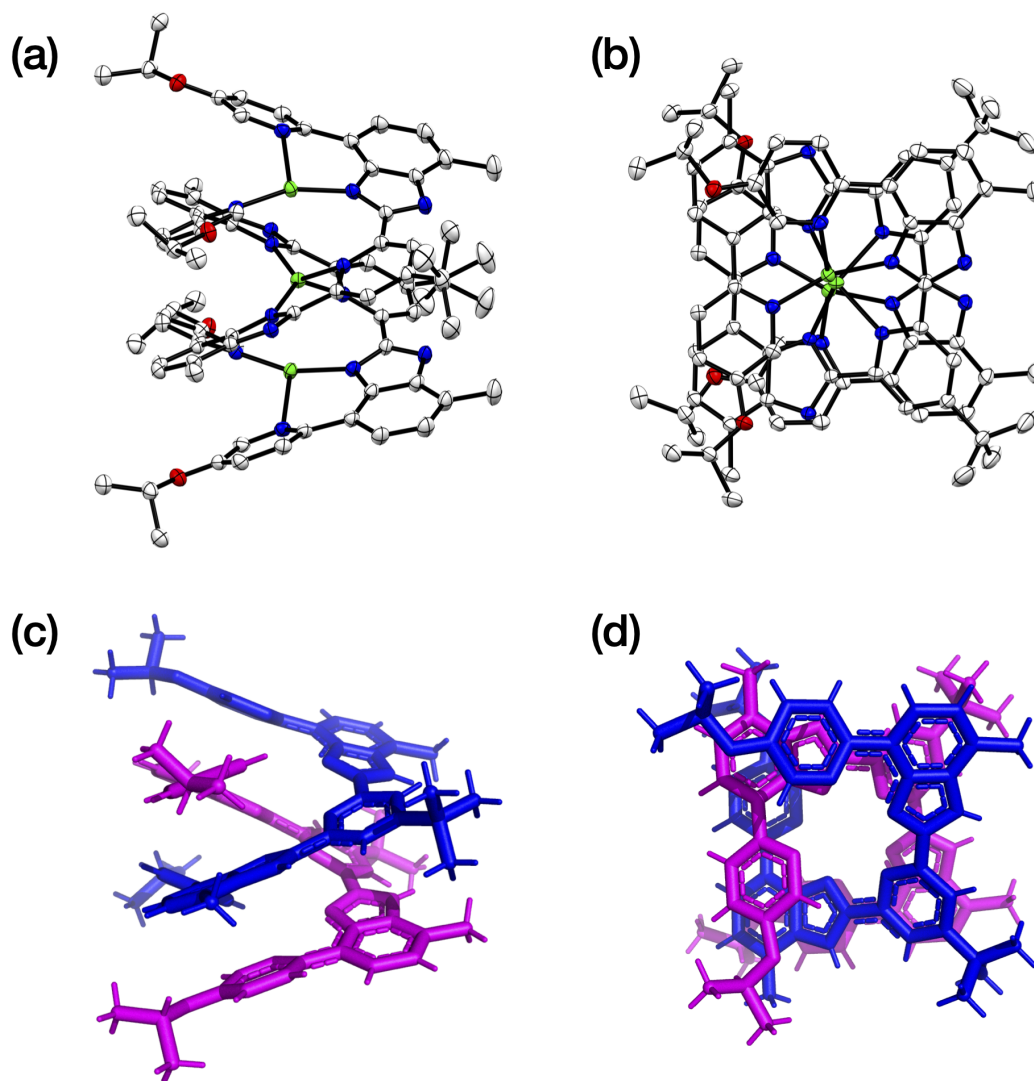

**Fig. S2.** X-ray structure of the cation of **1** as ORTEP diagrams with thermal ellipsoids at the 50% probability level (Cu is green, N is blue, and O is red): (a) side view; (b) top view. The hydrogen atoms were omitted for clarity. In (c) and (d) are capped-stick representations of individual ligand strands color-coded (blue and magenta) and metal atoms omitted to visualize the double-helical topology better.

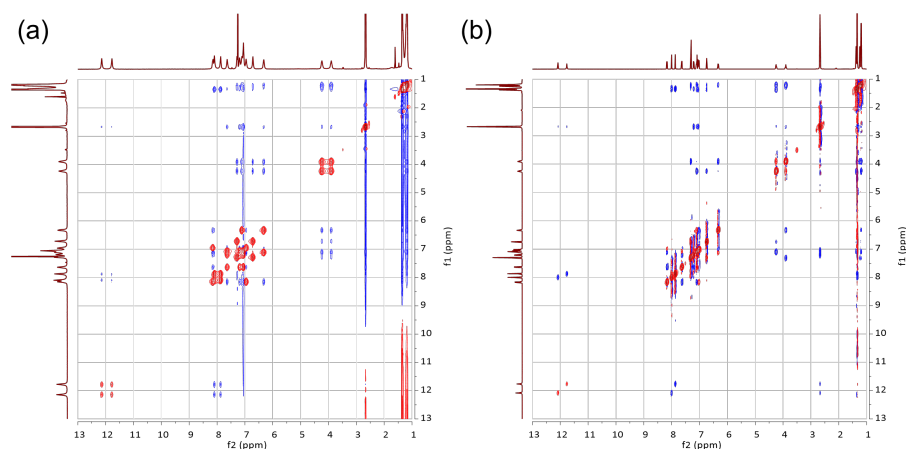

**Fig. S3.** 2D-ROESY NMR spectrum of **1** in  $\text{CDCl}_3$  with  $t_m = 500$  ms at (a)  $T = 298$  K, and (b)  $T = 233$  K; the corresponding 1D spectrum is shown along the ordinate. Blue (positive) signals are ROE resonances; red (negative) signals are exchange resonances.

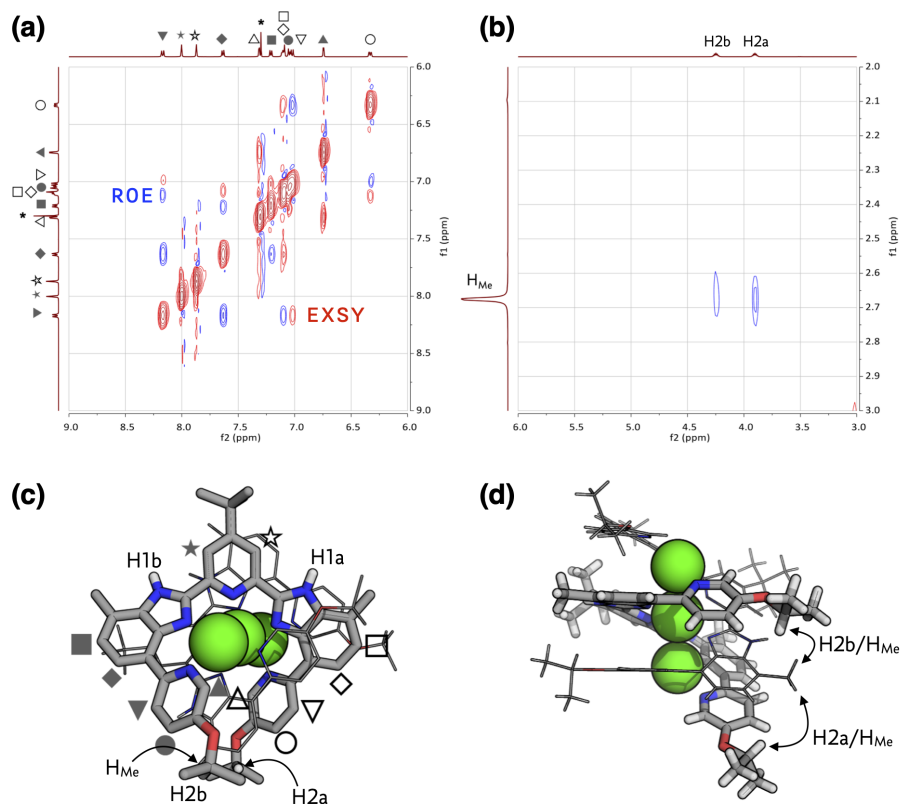

**Fig. S4.** 2D-ROESY NMR spectrum ( $\text{CDCl}_3$ ,  $T = 233$  K) of **1** in the (a) aromatic, and (b) aliphatic regions, along with (c) proton labeling scheme. Blue (positive) signals are ROE resonances; red (negative) signals are exchange resonances. (d) Through-space correlations between  $\text{H}_{\text{Me}}$  and  $\text{H}_{2\text{a}}/\text{H}_{2\text{b}}$ .

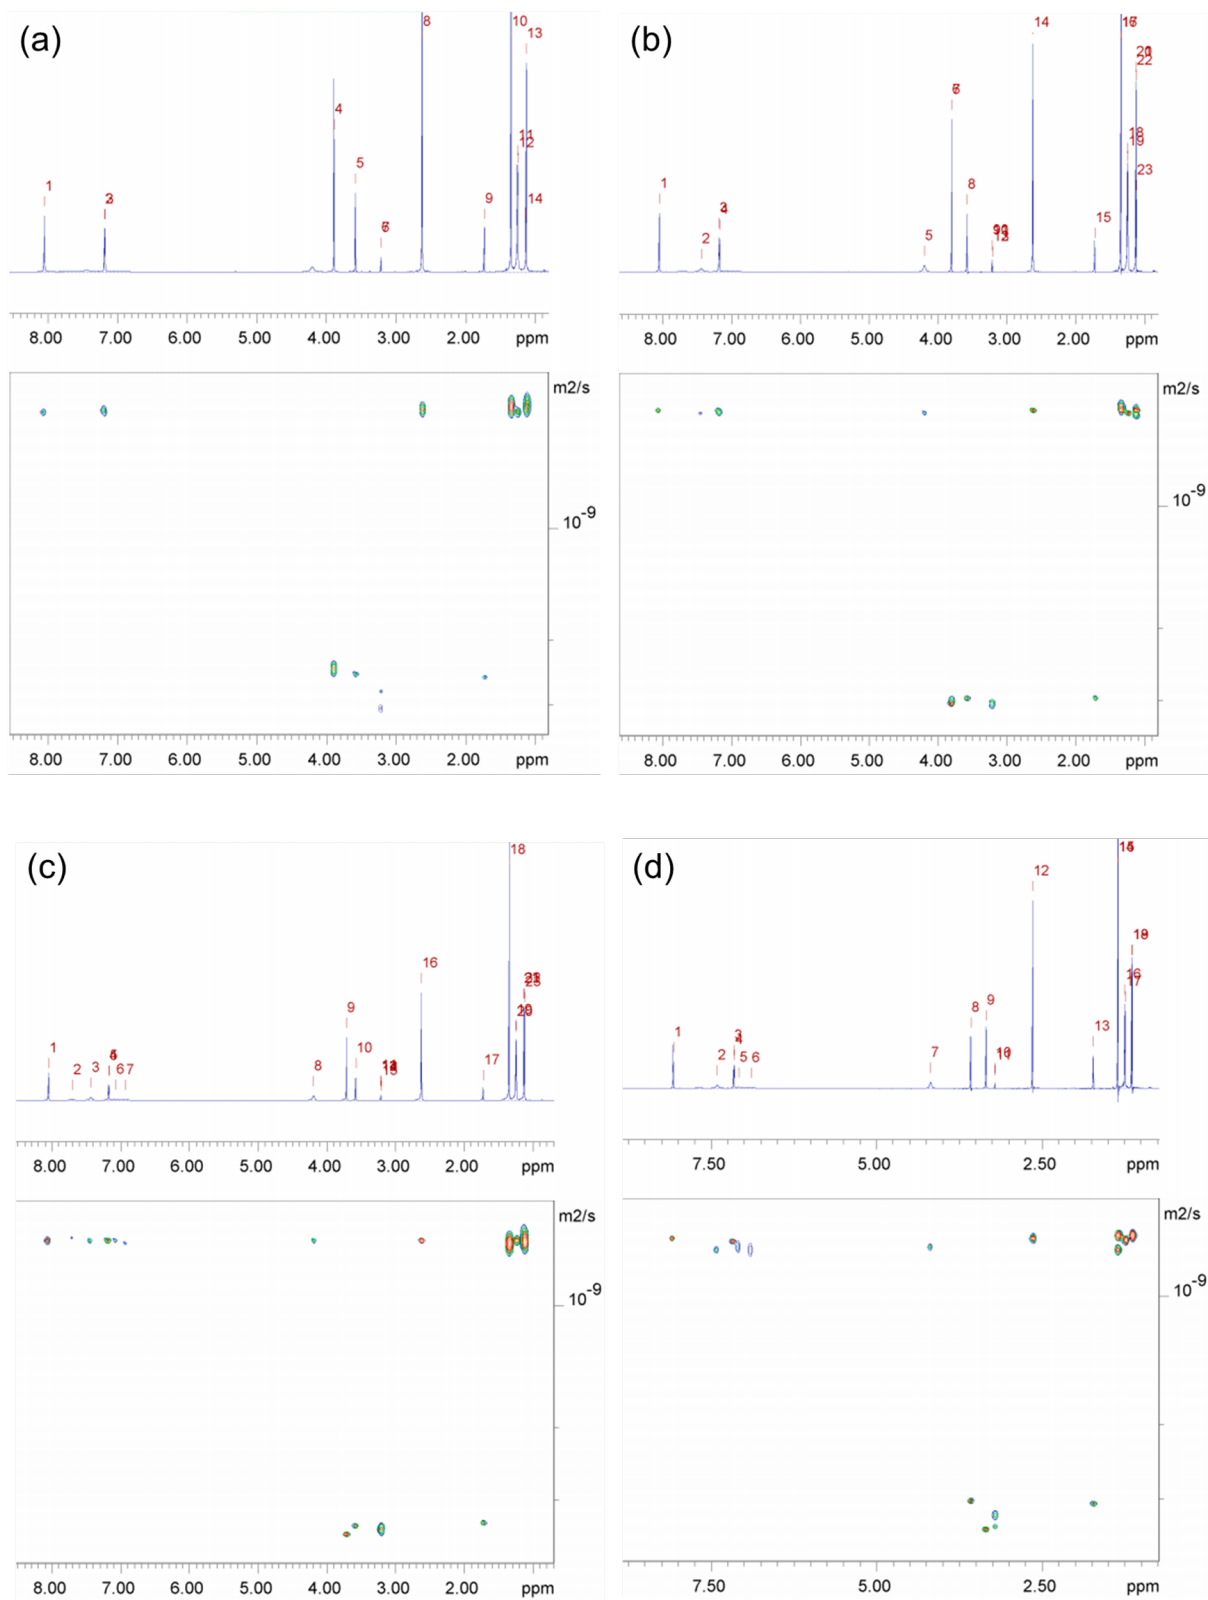

**Fig. S5.**  $^1\text{H}$  DOSY NMR spectra of **1** in  $\text{THF-}d_8$  at different temperatures of (a) 268 K, (b) 278 K, (c) 288 K and (d) 298 K.

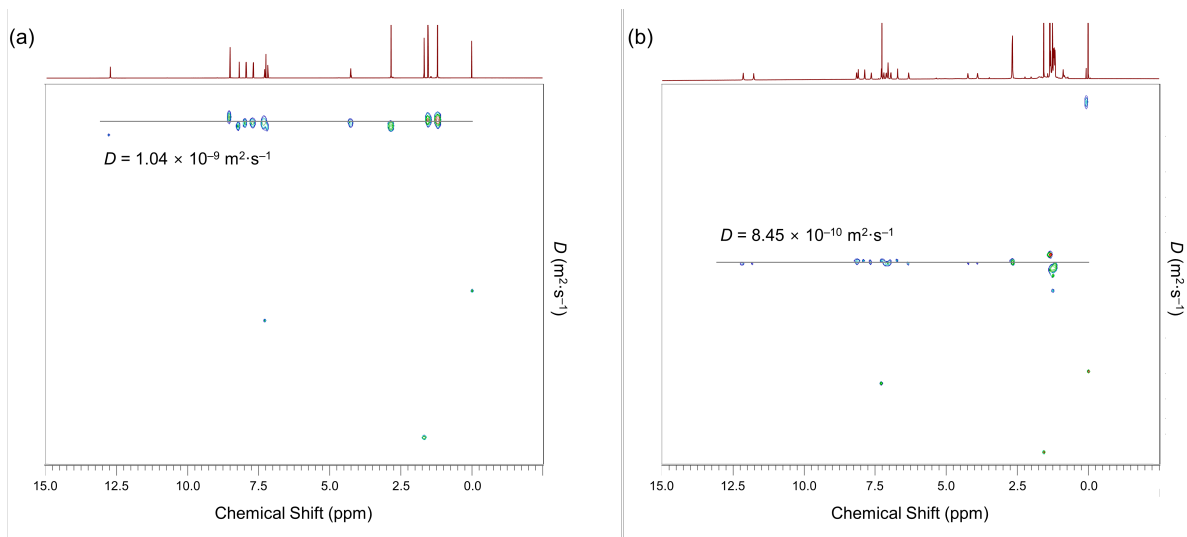

**Fig. S6.**  $^1\text{H}$  DOSY NMR spectrum of (a) **L** and (b) **1** in  $\text{CDCl}_3$  ( $T = 298$  K).

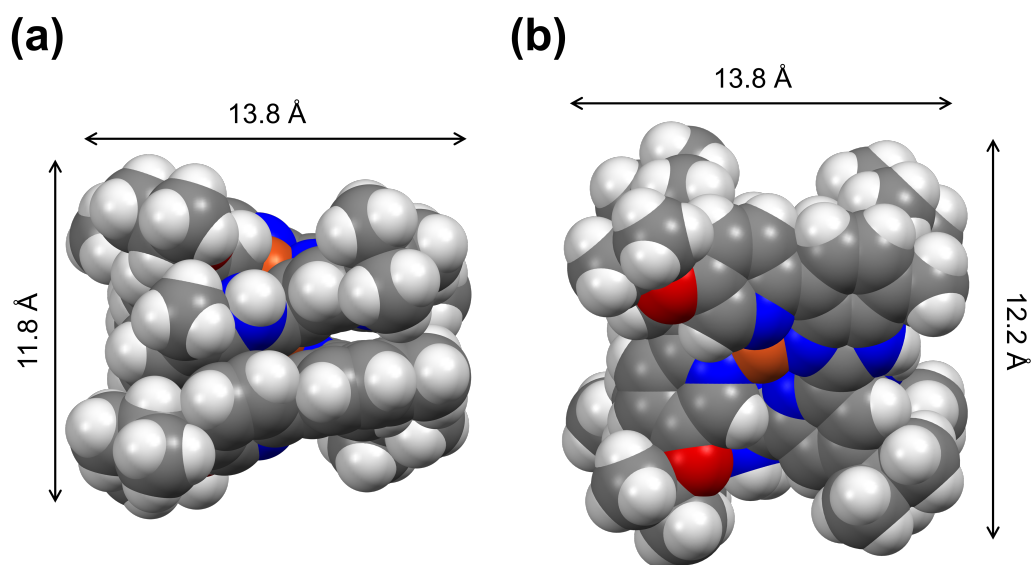

**Fig. S7.** (a) Side-on, and (b) face-on views of space-filling representations of the crystallographically determined three-dimensional structure of **1** cation.



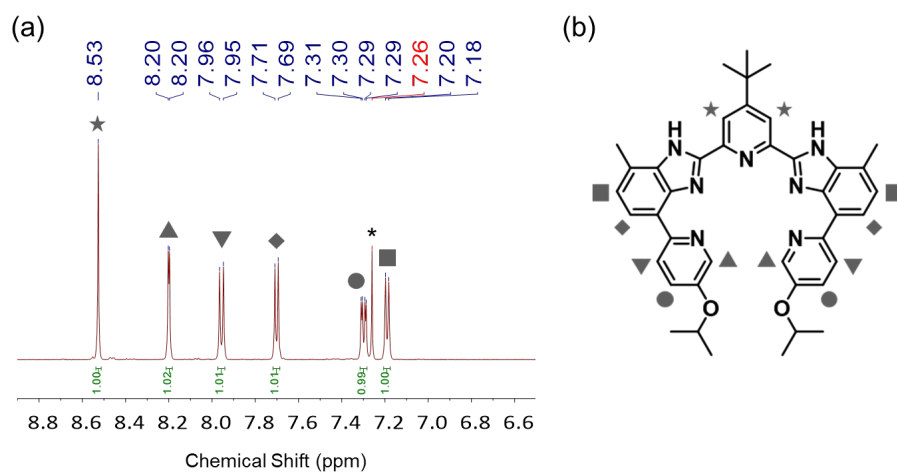

**Fig. S8.** (a) Partial  $^1\text{H}$  NMR spectrum of **L** in  $\text{CDCl}_3$  ( $T = 298$  K) showing the aromatic region. The residual solvent is designated with an asterisk. (b) Chemical structure of **L** with the aromatic protons labelled.

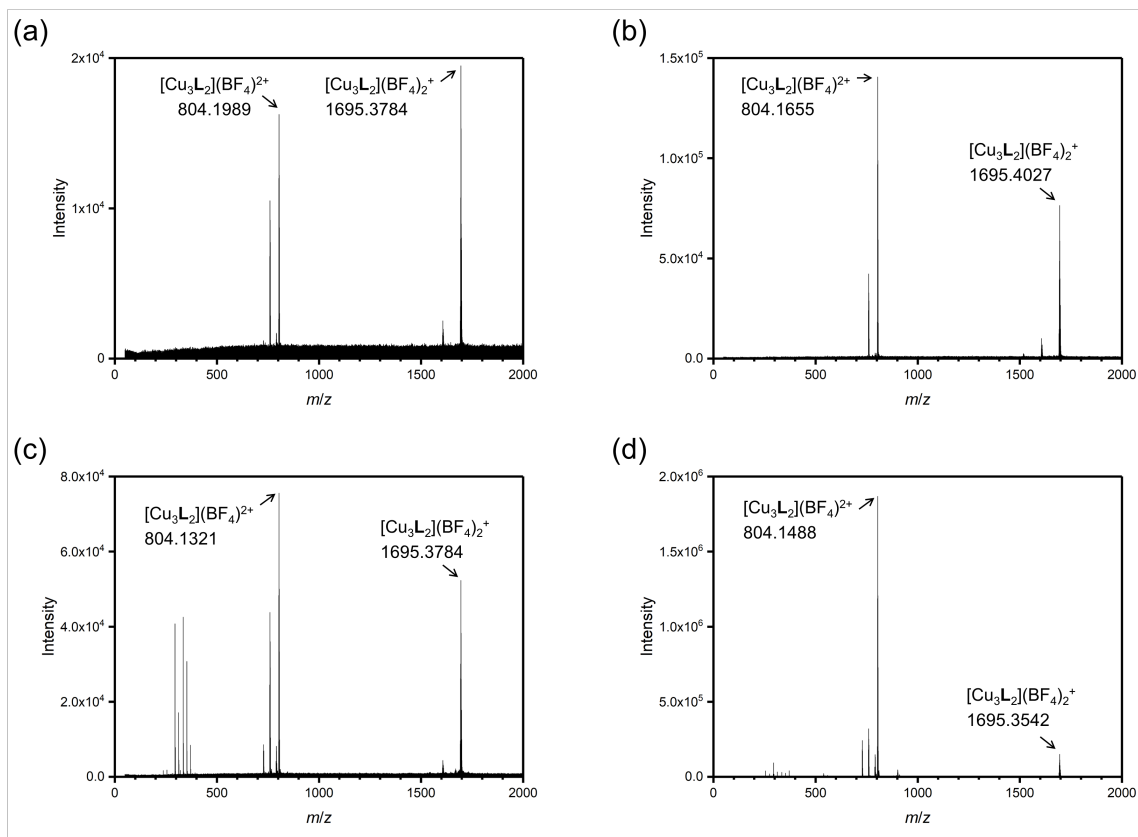

**Fig. S9.** CSI-MS spectra of **1** in (a)  $\text{CHCl}_3$ , (b)  $\text{CH}_2\text{Cl}_2$ , (c) THF, and (d) acetone at  $T = 233$  K.

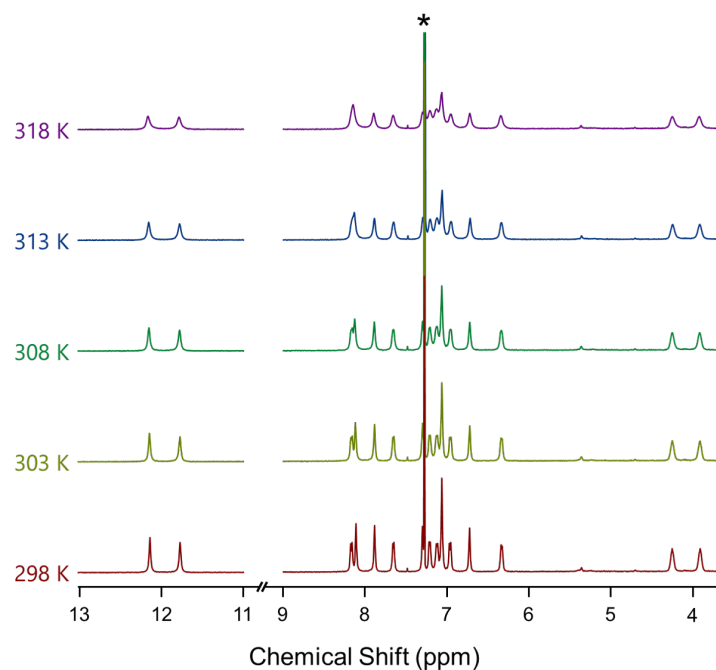

**Fig. S10.** Temperature-dependent ( $T = 298\text{--}398\text{ K}$ ) changes in the <sup>1</sup>H NMR spectra of **1** in CDCl<sub>3</sub>. The residual solvent is designated with an asterisk.

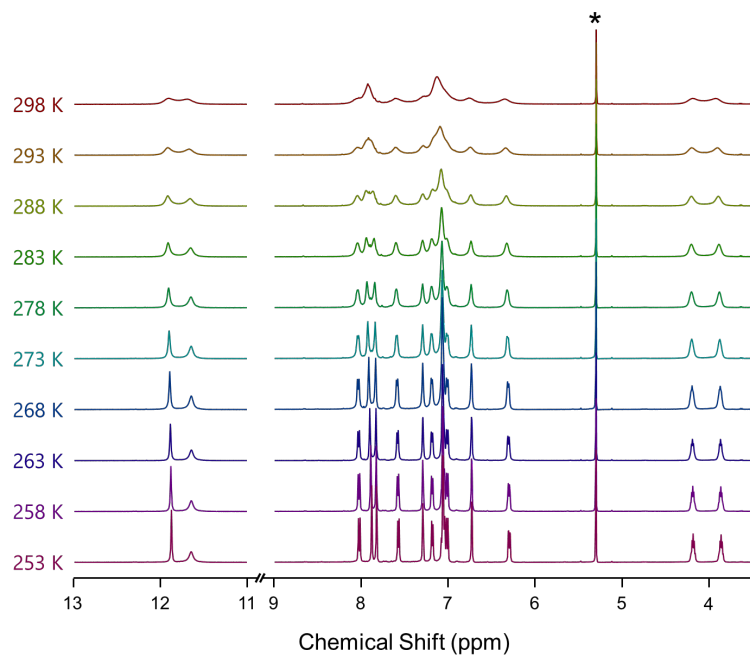

**Fig. S11.** Temperature-dependent ( $T = 253\text{--}298\text{ K}$ ) changes in the <sup>1</sup>H NMR spectra of **1** in CD<sub>2</sub>Cl<sub>2</sub>. The residual solvent is designated with an asterisk.

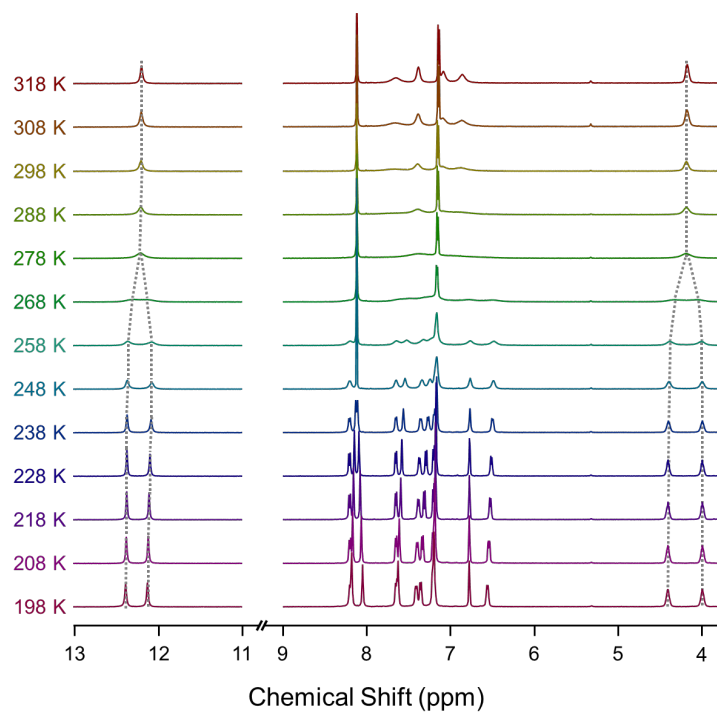

**Fig. S12.** Temperature-dependent ( $T = 198\text{--}318\text{ K}$ ) changes in the  $^1\text{H}$  NMR spectra of **1** in  $\text{THF-}d_8$ .

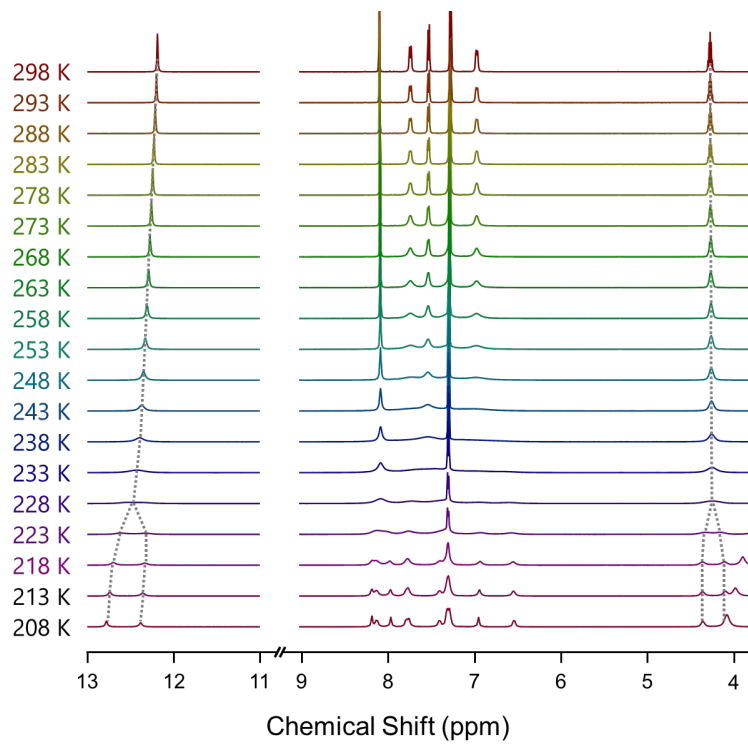

**Fig. S13.** Temperature-dependent ( $T = 208\text{--}298\text{ K}$ ) changes in the  $^1\text{H}$  NMR spectra of **1** in  $\text{acetone-}d_6$ .

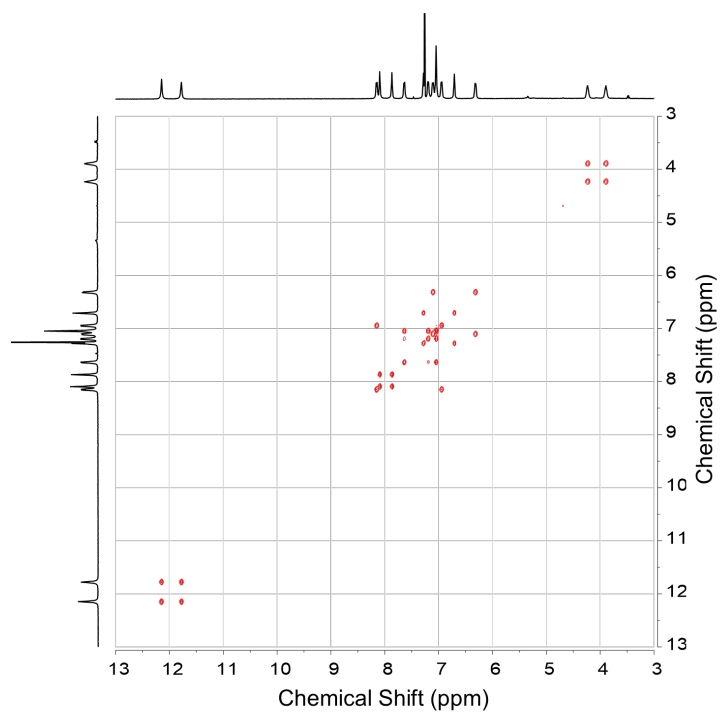

**Fig. S14.** Representative 2D  $^1\text{H}$ - $^1\text{H}$  EXSY NMR spectrum of **1** in  $\text{CDCl}_3$  with  $t_m = 100$  ms ( $T = 298$  K).

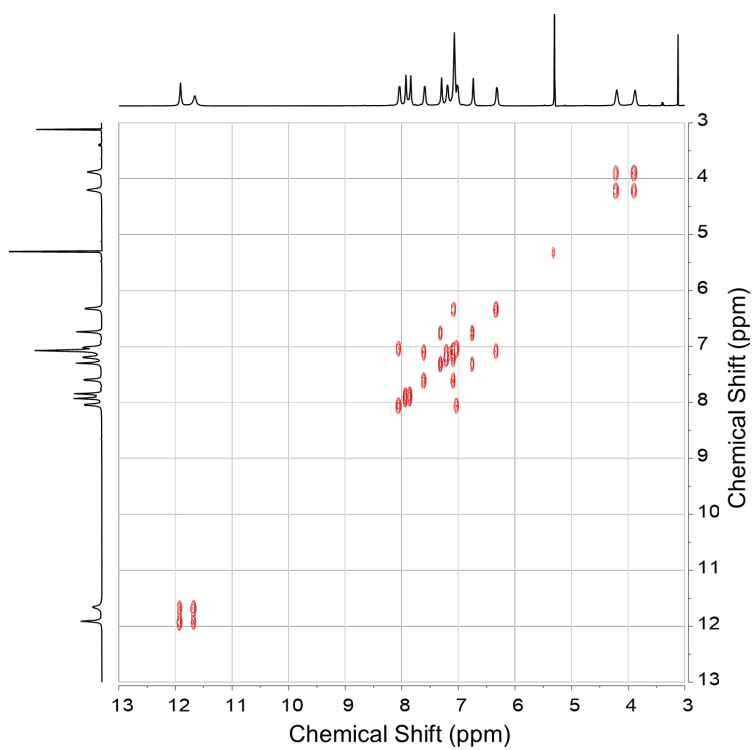

**Fig. S15.** Representative 2D  $^1\text{H}$ - $^1\text{H}$  EXSY NMR spectrum of **1** in  $\text{CD}_2\text{Cl}_2$  with  $t_m = 50$  ms ( $T = 273$  K).

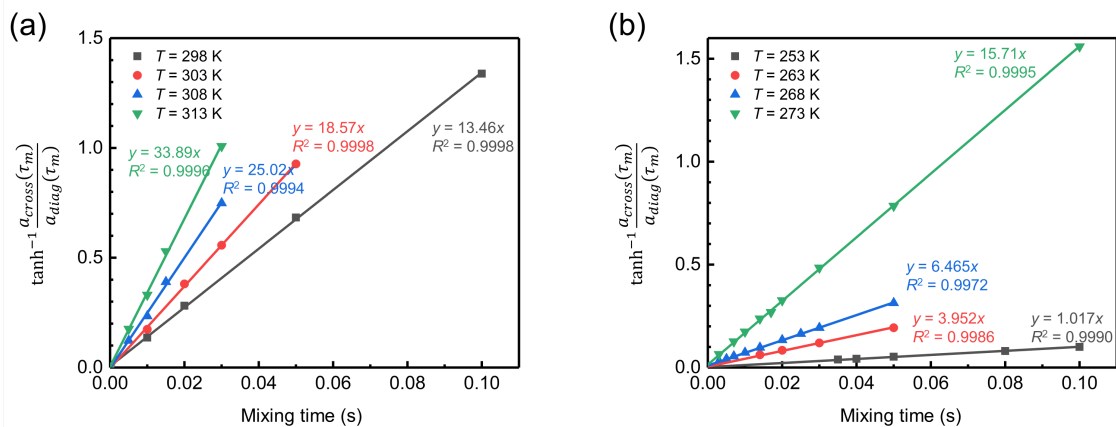

**Fig. S16.** Plots of mixing time vs  $\tanh^{-1} \frac{a_{cross}(\tau_m)}{a_{diag}(\tau_m)}$  obtained at various temperatures in (a) CDCl<sub>3</sub>, and (b) CD<sub>2</sub>Cl<sub>2</sub>.

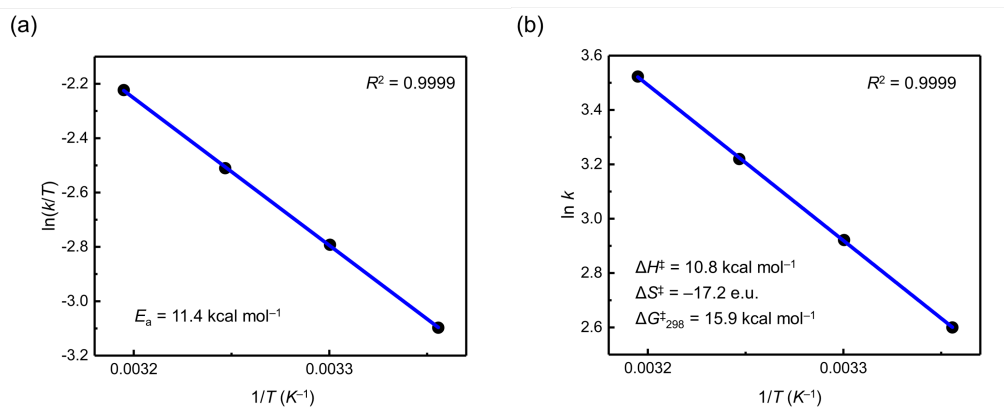

**Fig. S17.** (a) Arrhenius, and (b) Eyring plots constructed using the data in Table S4 for the helical motions of 1 in CDCl<sub>3</sub>.

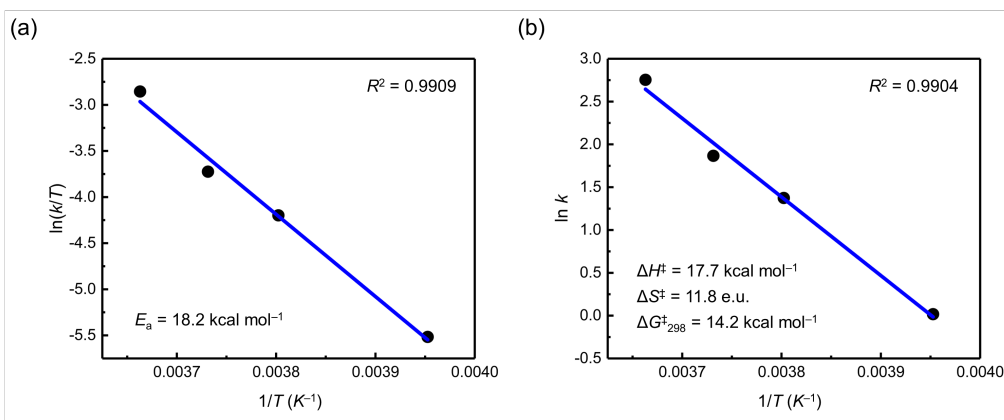

**Fig. S18.** (a) Arrhenius, and (b) Eyring plots constructed using the data in Table S5 for the helical motions of 1 in CD<sub>2</sub>Cl<sub>2</sub>.

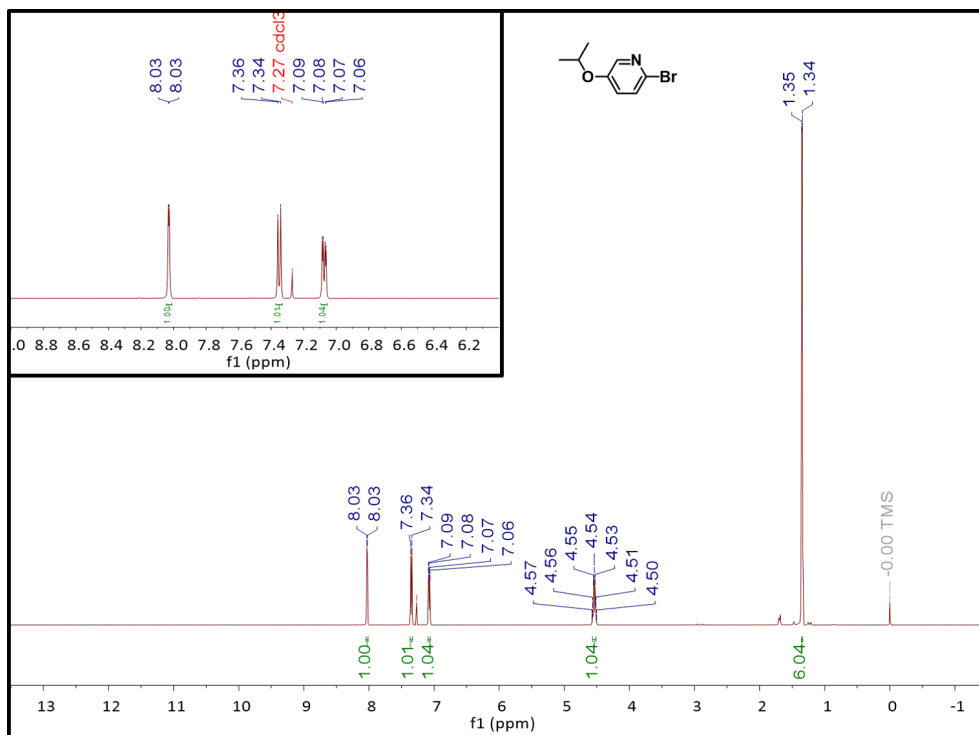

Fig. S19. <sup>1</sup>H NMR (500 MHz) spectrum of **2** in CDCl<sub>3</sub> (*T* = 298 K).

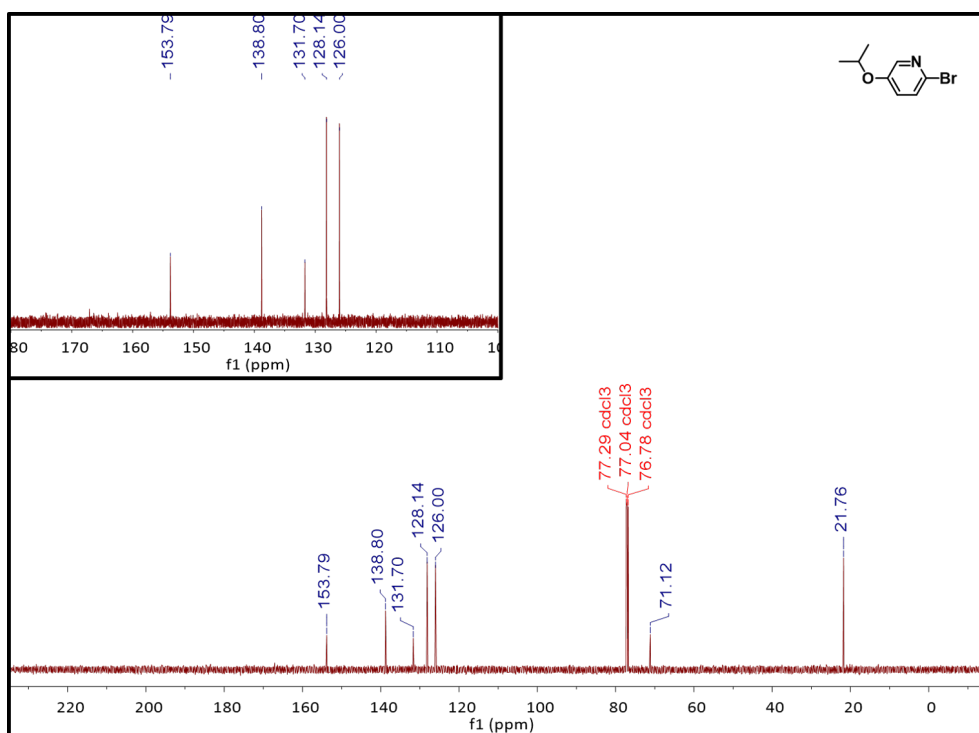

Fig. S20. <sup>13</sup>C NMR (125 MHz) spectrum of **2** in CDCl<sub>3</sub> (*T* = 298 K).

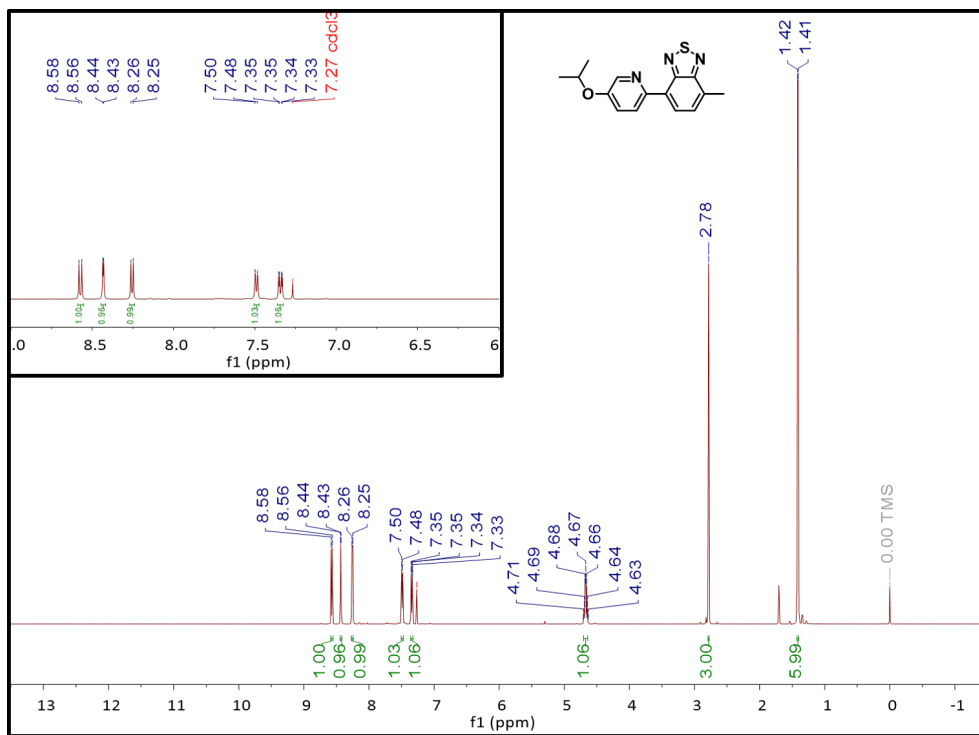

Fig. S21. <sup>1</sup>H NMR (500 MHz) spectrum of **3** in CDCl<sub>3</sub> (*T* = 298 K).

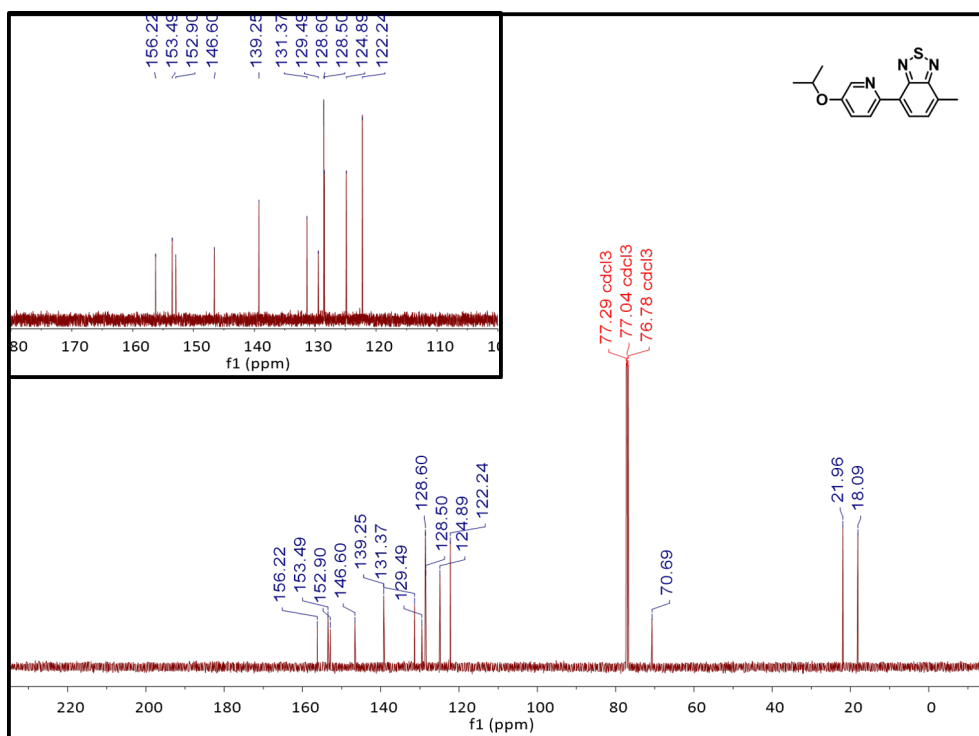

Fig. S22. <sup>13</sup>C NMR (125 MHz) spectrum of **3** in CDCl<sub>3</sub> (*T* = 298 K).

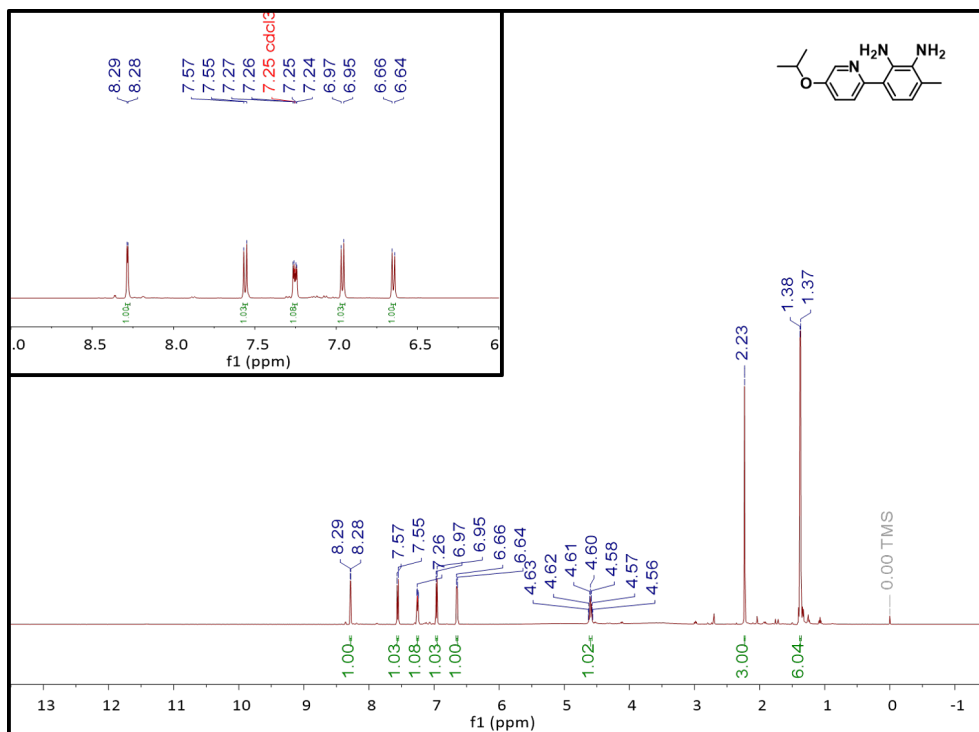

Fig. S23. <sup>1</sup>H NMR (500 MHz) spectrum of 4 in CDCl<sub>3</sub> (*T* = 298 K).

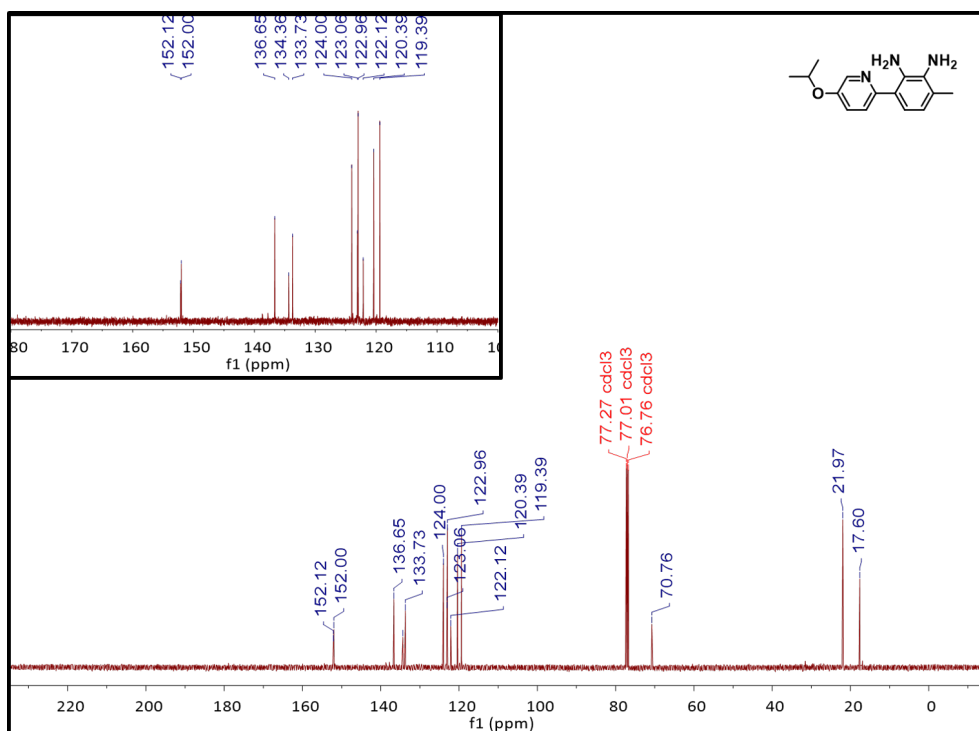

Fig. S24. <sup>13</sup>C NMR (125 MHz) spectrum of 4 in CDCl<sub>3</sub> (*T* = 298 K).



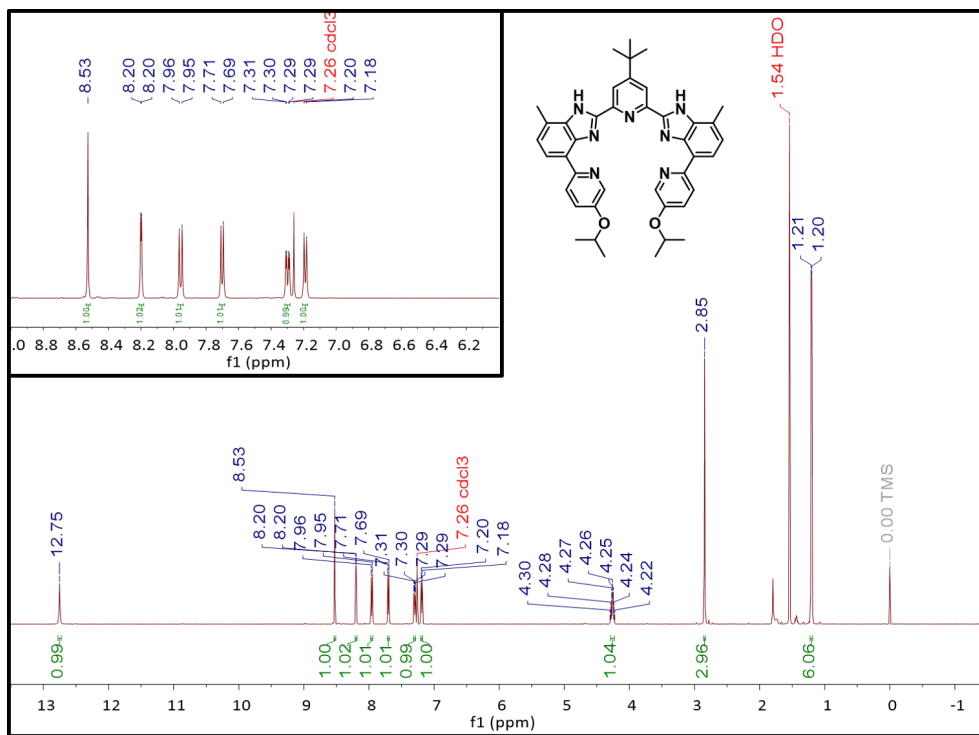

**Fig. S25.**  $^1\text{H}$  NMR (500 MHz) spectrum of **L** in  $\text{CDCl}_3$  ( $T = 298\text{ K}$ ).

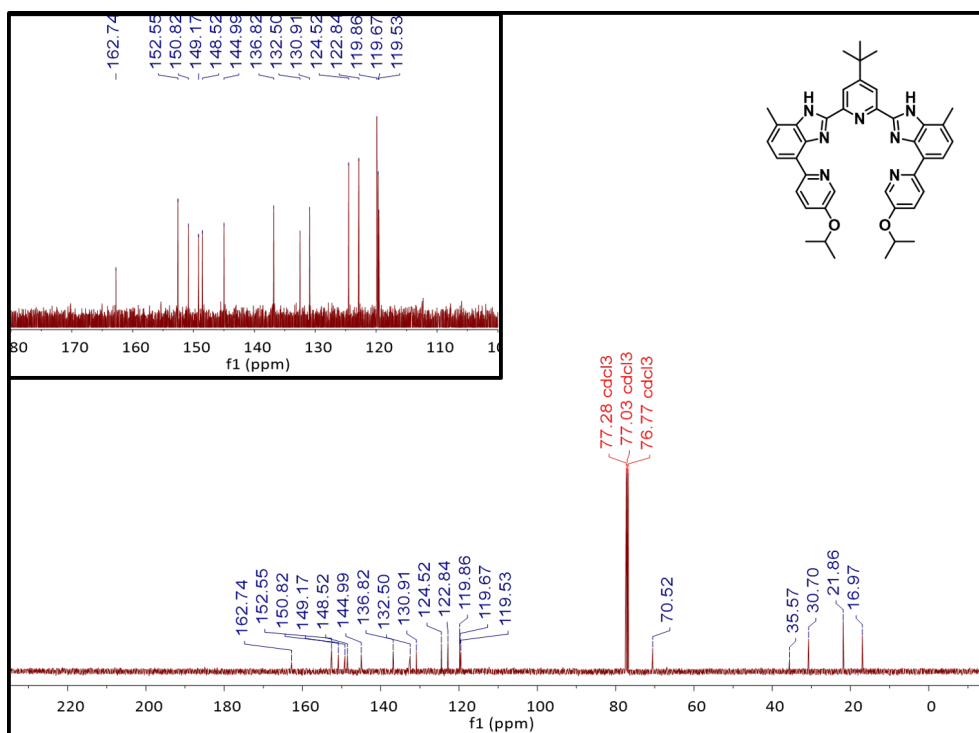

**Fig. S26.**  $^{13}\text{C}$  NMR (125 MHz) spectrum of **L** in  $\text{CDCl}_3$  ( $T = 298\text{ K}$ ).
